# Supplementary material
Source: publisher site journal article supplement (https://www.dovepress.com/article/259393)
Supplement: Supplementary file 1 [file get_supplementary_file.php]

Supplementary materials


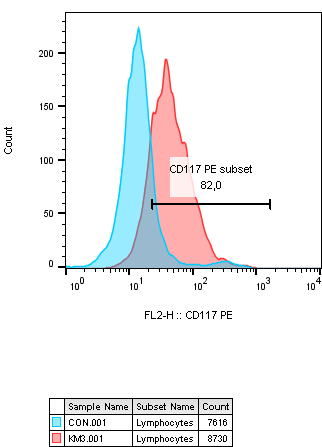


Figure S1. The expression of *CD117* in KM3 lines is about 82%.


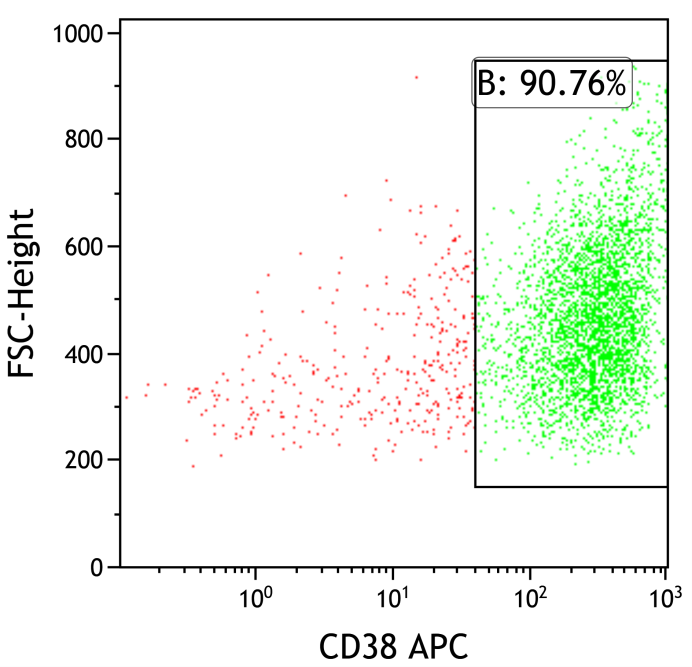


Figure S2. The cell sorting purity is 90.76%.


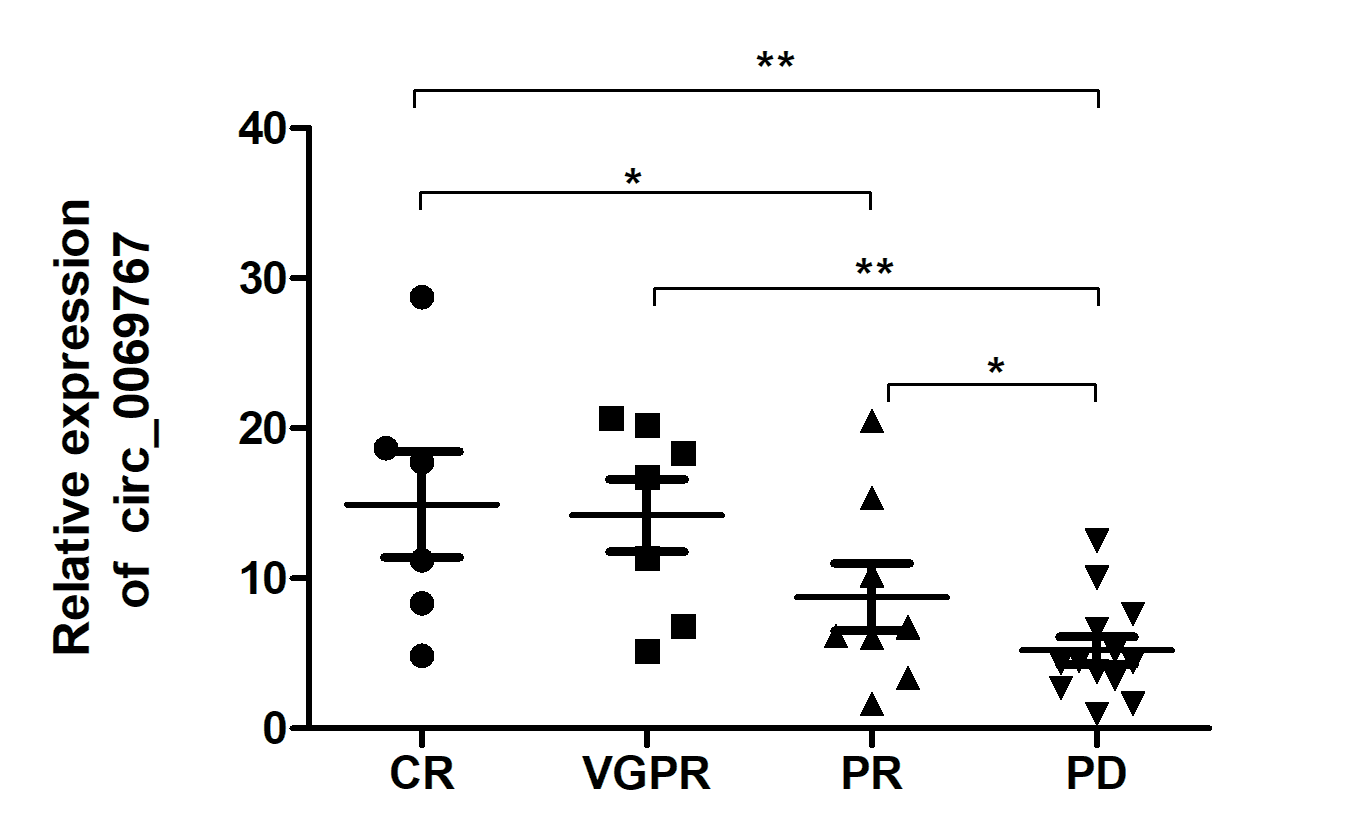


Figure S3. The expression of *circ_0069767* in CR/VGPR/PR/PD patients were detected after bortezomib-based treatment. The expression of *circ_0069767* in PD patients was the lowest. **p*<0.05, ***p*<0.01.
